# Supplementary material for: Cancer Site-Specific Multiple microRNA Quantification by Droplet Digital PCR
Source: Front Oncol. 2018 Oct 15;8:447. doi: 10.3389/fonc.2018.00447 (PMC6196277; doi:10.3389/fonc.2018.00447)
Supplement: Supplementary file 1 [file Table_1.XLSX]

## Sheet: STable1
Supplementary Table 1. Detailed characteristics of tumor samples
Patient N.	Primary site	Histology	Stage
1	testis	seminoma of testis	pT1aN0
2	pancreas	ductal adenocarcinoma	pT2N1
3	gastric	neuroendocrine tumor of stomach	pT2N0 G1
4	prostate	prostate tumor	pT2aN0
5	kidney	clear cell renal cell carcinoma	pT1aN0
6	ureter	transitional cell carcinoma of the ureter	pT1N0
7	breast	ductal carcinoma	pT1aN0
8	colon	adenocarcinoma	pT3N0
9	gastric	adenocarcinoma intestinal type	pT2N1
10	liver	hepatocellular carcinoma	pT1bN0
11	lung	adenocarcinoma	pT1cN1
12	skin	malignat melanoma	pT2aN0
13	ovary	clear cell carcinoma of ovary	pT1bN0
14	endometrium	endometrioid carcinoma of corpus uteri	pT1bN1
